# Supplementary material for: A microsystem for sensing and patterning oxidative microgradients during cell culture
Source: Royal Society of Chemistry journal article supplement (doi:10.1039/b516483d), 2006-01-01
Supplement: b516483d.pdf [file b516483d.pdf]

| Design      | Electrode center ( $\mu\text{m}$ )                                                                                                                              | Electrode width ( $\mu\text{m}$ )                                                                                                        |
|-------------|-----------------------------------------------------------------------------------------------------------------------------------------------------------------|------------------------------------------------------------------------------------------------------------------------------------------|
| Figure 4a   | 0.0                                                                                                                                                             | 20.0                                                                                                                                     |
| Figure 4b   | 0.0, 200.0, 400.0                                                                                                                                               | 20.0, 20.0, 20.0                                                                                                                         |
| Figure 4c   | -130.5, -72.5, -17.5, 38.0, 90.5,<br>142.0, 192.5, 227.5                                                                                                        | 3.0, 5.0, 7.0, 8.0, 9.0,<br>10.0, 15.0, 41.0                                                                                             |
| Figure 4d   | -427.0, -384.5, -339.5, -295.0, -252.5,<br>-209.5, -167.5, -126.5, -86.0, -47.5,<br>0.0, 47.5, 86.0, 126.5, 167.5,<br>209.5, 252.5, 295, 339.5, 384.5,<br>427.0 | 20.0, 27.0, 25.0, 26.0, 27.0,<br>27.0, 27.0, 27.0, 28.0, 25.0,<br>40.0, 25.0, 28.0, 27.0, 27.0,<br>27.0, 27.0, 26.0, 25.0, 27.0,<br>20.0 |
| Figure 4e   | -358.0, -300.1, -245.0, -190.0, -137.1,<br>-85.8, -35.2, 0.0, 35.2, 85.8,<br>137.1, 190.0, 245.0, 300.1, 358.0                                                  | 3.0, 5.1, 6.9, 8.1, 9.2,<br>10.6, 13.4, 41, 13.4, 10.6,<br>9.2, 8.1, 6.9, 5.1, 3.0                                                       |
| Figure 4f   | 150.0                                                                                                                                                           | 20.0                                                                                                                                     |
| Figure 7c,f | 0.0, 35.2, 85.8, 137.1, 190.0,<br>245.0, 300.1, 358.0                                                                                                           | 41.0, 13.4, 10.6, 9.2, 8.1,<br>6.9, 5.1, 3.0                                                                                             |

**Table 1** Coordinates of the electrode center and electrode width for all designs presented in this paper. The origin is taken to be at the center of the figures referenced.
